# Supplementary material for: Molecular phylogenetics of slit‐faced bats (Chiroptera: Nycteridae) reveal deeply divergent African lineages
Source: PubMed Central journal article supplement (PMC6919933; doi:10.1111/jzs.12313), 2019-08-20

**Demos T.C.**, Webala P.W., Kerbis Peterhans J.C., Goodman S.M., Bartonjo M., and Patterson B.D. Molecular phylogenetics of slit-faced bats (Chiroptera: Nycteridae) reveals deeply divergent African lineages. *Journal of Zoological Systematics and Evolutionary Research*.

**Supplemental Information Table S1.** List of specimens used in genetic analyses of *Nycteris*. Specimen details, localities, and GenBank accession numbers of sampled individuals of *Nycteris*: FMNH — Field Museum of Natural History, Chicago; LSUMZ — Louisiana State University, Museum of Natural Science; MHNG — Muséum d'Histoire Naturelle, Genève; NMK — National Museums of Kenya, Nairobi; ROM — Royal Ontario Museum, Toronto; TTU — Museum of Texas Tech University, Lubbock.

| <b>Taxon</b>                       | <b>Voucher No.</b> | <b>Country</b>               | <b>County</b> | <b>Locality</b>                                               | <b>Latitude</b> | <b>Longitude</b> |
|------------------------------------|--------------------|------------------------------|---------------|---------------------------------------------------------------|-----------------|------------------|
| <i>Nycteris arge</i> 1             | FMNH 227433        | Central African Republic     |               | Parc National de Dzanga-Ndoki, Mabea Bai, 21.4 kms NE Bayanga | 3.0333          | 16.41            |
| <i>Nycteris arge</i> 1             | FMNH 167763        | Gabon                        |               | Réserve de la Moukalaba, 12.2 km NW Doussala                  | -2.283333       | 10.49722         |
| <i>Nycteris arge</i> 1             | FMNH 232918        | Uganda                       |               | Budongo CFR, Budongo Siba block                               | 1.706146        | 31.48824         |
| <i>Nycteris arge</i> 1             | FMNH 222429        | Democratic Republic of Congo |               | 14 km by road N Boende, Quatorze                              | 0.16764         | 20.92603         |
| <i>Nycteris arge</i> 1             | FMNH 226934        | Democratic Republic of Congo |               | Katopa, west side of Lomani River (left bank)                 | -2.747295       | 25.10126         |
| <i>Nycteris arge</i> 2             | NMK 184961         | Kenya                        | Kakamega      | Kakamega Forest National Reserve, Buzambuli Trail 1           | 0.35006         | 34.86141         |
| <i>Nycteris arge</i> 2             | NMK 184967         | Kenya                        | Kakamega      | Kakamega Forest, Ikhondo Junction                             | 0.35293         | 34.86201         |
| <i>Nycteris arge</i> 2             | NMK 187405         | Kenya                        | Kakamega      | Kakamega Forest, Colobus Circuit 1                            | 0.3561          | 34.86135         |
| <i>Nycteris arge</i> 2             | FMNH 215539        | Kenya                        | Kakamega      | Kakamega National Reserve, Buyangu Village                    | 0.3523          | 34.86469         |
| <i>Nycteris arge</i> 2             | FMNH 215540        | Kenya                        | Kakamega      | Kakamega National Reserve, Buyangu Village                    | 0.3523          | 34.86469         |
| <i>Nycteris arge</i> 2             | FMNH 224102        | Uganda                       |               | Kibale Forest NP, Ngogo, 24 km SE of Fort Portal              | 30.0628         | 30.42608         |
| <i>Nycteris arge</i> 2             | FMNH 224103        | Uganda                       |               | Kibale Forest NP, Ngogo, 24 km SE of Fort Portal              | 30.0628         | 30.42608         |
| <i>Nycteris arge</i> 2             | FMNH 224104        | Uganda                       |               | Kibale Forest NP, Ngogo, 24 km SE of Fort Portal              | 30.0628         | 30.42608         |
| <i>Nycteris arge</i> 2             | FMNH 222430        | Democratic Republic of Congo |               | 14 km by road N Boende, Quatorze                              | 0.16764         | 20.92603         |
| <i>Nycteris arge</i> 2             | FMNH 149405        | Democratic Republic of Congo |               | Epulu, Epulu R, right bank                                    | -1.4166         | 28.5833          |
| <i>Nycteris cf. hispida/aurita</i> | FMNH 220978        | Kenya                        | Kajiado       | Amboseli National Park, Amboseli Serena Lodge                 | -2.70548        | 37.26607         |
| <i>Nycteris cf. hispida/aurita</i> | FMNH 220979        | Kenya                        | Kajiado       | Amboseli National Park, Amboseli Serena Lodge                 | -2.70548        | 37.26607         |
| <i>Nycteris cf. hispida/aurita</i> | FMNH 220982        | Kenya                        | Kajiado       | Amboseli National Park, Amboseli Serena Lodge                 | -2.70548        | 37.26607         |
| <i>Nycteris cf. hispida/aurita</i> | FMNH 187139        | Tanzania                     |               | Tarangire National Park, Foley's Camp                         | -3.79785        | 36.06882         |
| <i>Nycteris cf. thebaica</i> 1     | FMNH 226239        | Malawi                       |               | Mangochi Hills, Skull Rock Scout Camp                         | -14.50872       | 35.23344         |
| <i>Nycteris cf. thebaica</i> 1     | FMNH 195603        | South Africa                 |               | Marloth Park, Lionspruit                                      | -25.35819       | 31.79019         |

|                                |             |                          |          |                                                                                     |           |          |
|--------------------------------|-------------|--------------------------|----------|-------------------------------------------------------------------------------------|-----------|----------|
| <i>Nycteris cf. thebaica</i> 1 | FMNH 195604 | South Africa             |          | Marloth Park, Lionspruit                                                            | -25.35819 | 31.79019 |
| <i>Nycteris cf. thebaica</i> 1 | FMNH 195605 | South Africa             |          | Marloth Park, Lionspruit                                                            | -25.35819 | 31.79019 |
| <i>Nycteris cf. thebaica</i> 1 | FMNH 195606 | South Africa             |          | Marloth Park, Lionspruit                                                            | -25.35819 | 31.79019 |
| <i>Nycteris cf. thebaica</i> 2 | NMK 184384  | Kenya                    | Marsabit | Marsabit National Park and Reserve, 6.07 km SW campground near headquarters (NETSI) | 2.28311   | 37.95428 |
| <i>Nycteris cf. thebaica</i> 2 | NMK 184231  | Kenya                    | Marsabit | Marsabit National Park and Reserve, campground near headquarters, officers housing  | 2.32036   | 37.99402 |
| <i>Nycteris cf. thebaica</i> 3 | FMNH 158336 | Tanzania                 |          | Uluguru Mts, Uluguru North Forest Reserve, 3 km W, 1.3 km N Tegetero                | -6.929167 | 37.70556 |
| <i>Nycteris grandis</i>        | FMNH 227439 | Central African Republic |          | Parc National de Dzanga-Ndoki, Mabea Bai, 21.4 kms NE Bayanga                       | 3.0333    | 16.41    |
| <i>Nycteris grandis</i>        | FMNH 227441 | Central African Republic |          | Parc National de Dzanga-Ndoki, Mabea Bai, 21.4 kms NE Bayanga                       | 3.0333    | 16.41    |
| <i>Nycteris grandis</i>        | FMNH 227442 | Central African Republic |          | Parc National de Dzanga-Ndoki, Mabea Bai, 21.4 kms NE Bayanga                       | 3.0333    | 16.41    |
| <i>Nycteris grandis</i>        | FMNH 213625 | Mozambique               |          | near Mossuril, near ruins of Portugese ruler house                                  | -14.96778 | 40.66389 |
| <i>Nycteris grandis</i>        | FMNH 150065 | Tanzania                 |          | East Usambara Mts, 4.5 km WNW Amani, Monga Tea Estate                               | -5.1      | 38.6     |
| <i>Nycteris grandis</i>        | FMNH 151416 | Tanzania                 |          | East Usambara Mts, 4.5 km WNW Amani, Monga Tea Estate                               | -5.1      | 38.6     |
| <i>Nycteris grandis</i>        | FMNH 168092 | Tanzania                 |          | East Usambara Mts, 4.5 km WNW Amani, Monga Tea Estate                               | -5.1      | 38.6     |
| <i>Nycteris grandis</i>        | FMNH 151187 | Tanzania                 |          | Gonja Forest Reserve, 2 km SW Gonja Maore                                           | -4.2667   | 38.0333  |
| <i>Nycteris grandis</i>        | FMNH 151188 | Tanzania                 |          | Gonja Forest Reserve, 2 km SW Gonja Maore                                           | -4.2667   | 38.0333  |
| <i>Nycteris grandis</i>        | FMNH 151189 | Tanzania                 |          | Gonja Forest Reserve, 2 km SW Gonja Maore                                           | -4.2667   | 38.0333  |
| <i>Nycteris grandis</i>        | FMNH 151190 | Tanzania                 |          | Gonja Forest Reserve, 2 km SW Gonja Maore                                           | -4.2667   | 38.0333  |
| <i>Nycteris grandis</i>        | FMNH 192936 | Tanzania                 |          | Minziro Forest                                                                      | -1.094181 | 31.51538 |
| <i>Nycteris grandis</i>        | FMNH 192814 | Tanzania                 |          | Ngezi Forest                                                                        | -4.942739 | 39.70823 |
| <i>Nycteris grandis</i>        | FMNH 192815 | Tanzania                 |          | Ngezi Forest                                                                        | -4.942739 | 39.70823 |
| <i>Nycteris grandis</i>        | FMNH 192816 | Tanzania                 |          | Ngezi Forest                                                                        | -4.941761 | 39.71035 |
| <i>Nycteris grandis</i>        | FMNH 192883 | Tanzania                 |          | Ngezi Forest, Chonja village                                                        | -4.950581 | 39.72918 |
| <i>Nycteris grandis</i>        | FMNH 192884 | Tanzania                 |          | Ngezi Forest, Chonja village                                                        | -4.950581 | 39.72918 |

|                                |               |                              |          |                                                               |           |          |
|--------------------------------|---------------|------------------------------|----------|---------------------------------------------------------------|-----------|----------|
| <i>Nycteris grandis</i>        | FMNH 192885   | Tanzania                     |          | Ngezi Forest, Chonja village                                  | -4.950581 | 39.72918 |
| <i>Nycteris grandis</i>        | FMNH 192882   | Tanzania                     |          | Ngezi Forest, Kibatini village                                | -4.956569 | 39.71779 |
| <i>Nycteris grandis</i>        | FMNH 222427   | Democratic Republic of Congo |          | 14 km by road N Boende, Quatorze                              | 0.16764   | 20.92603 |
| <i>Nycteris grandis</i>        | FMNH 222428   | Democratic Republic of Congo |          | 14 km by road N Boende, Quatorze                              | 0.16764   | 20.92603 |
| <i>Nycteris grandis</i>        | FMNH 219603   | Democratic Republic of Congo |          | Baliko                                                        | 0.24128   | 20.8833  |
| <i>Nycteris hispida/aurita</i> | FMNH 227445   | Central African Republic     |          | Parc National de Dzanga-Ndoki, Mabea Bai, 21.4 kms NE Bayanga | 3.0333    | 16.41    |
| <i>Nycteris hispida/aurita</i> | FMNH 220980   | Kenya                        | Kajiado  | Amboseli Elephant Research Camp                               | -2.6789   | 37.26656 |
| <i>Nycteris hispida/aurita</i> | FMNH 215546   | Kenya                        | Kisumu   | Kisumu Impala Sanctuary, State Lodge Campsite                 | -0.10961  | 34.74593 |
| <i>Nycteris hispida/aurita</i> | FMNH 215547   | Kenya                        | Kisumu   | Kisumu Impala Sanctuary, State Lodge Campsite                 | -0.10961  | 34.74593 |
| <i>Nycteris hispida/aurita</i> | FMNH 215548   | Kenya                        | Kisumu   | Kisumu Impala Sanctuary, State Lodge Campsite                 | -0.10961  | 34.74593 |
| <i>Nycteris hispida/aurita</i> | FMNH 225445   | Kenya                        | Narok    | Masai Mara National Reserve, Sarova Mara Lodge                | -1.53105  | 35.32022 |
| <i>Nycteris hispida/aurita</i> | FMNH 220746   | Kenya                        | Meru     | Meru National Park, Murera Gate guardhouse                    | 0.267933  | 38.12063 |
| <i>Nycteris hispida/aurita</i> | NMK 184937    | Kenya                        | Kakamega | Mungokho Village                                              | 0.37485   | 34.89849 |
| <i>Nycteris hispida/aurita</i> | NMK 184976    | Kenya                        | Kakamega | Mungokho Village                                              | 0.37485   | 34.89849 |
| <i>Nycteris hispida/aurita</i> | MHNG 1971.039 | Malawi                       |          | Mt Mulanje, Illingworth forest                                | -16.02775 | 35.52214 |
| <i>Nycteris hispida/aurita</i> | MHNG 1971.04  | Malawi                       |          | Mt Mulanje, Illingworth forest                                | -16.02775 | 35.52214 |
| <i>Nycteris hispida/aurita</i> | FMNH 225217   | Rwanda                       |          | Akagera National Park, Bacherie Fishing Camp                  | -1.89255  | 30.73215 |
| <i>Nycteris hispida/aurita</i> | FMNH 225218   | Rwanda                       |          | Akagera National Park, Ruzizi tented camp                     | -1.90634  | 30.71696 |
| <i>Nycteris hispida/aurita</i> | FMNH 225240   | Rwanda                       |          | Lake Gashora                                                  | -2.19315  | 30.23961 |
| <i>Nycteris hispida/aurita</i> | FMNH 195607   | South Africa                 |          | Ehlanzeni Municipality, Ingwenya Farm (409 SU)                | -25.56278 | 31.85066 |
| <i>Nycteris hispida/aurita</i> | FMNH 151191   | Tanzania                     |          | Gonja Forest Reserve, 2 km SW Gonja Maore                     | -4.2667   | 38.0333  |
| <i>Nycteris hispida/aurita</i> | FMNH 232892   | Uganda                       |          | Bikongoro Village, Buliisa                                    | 2.076738  | 31.43591 |
| <i>Nycteris hispida/aurita</i> | FMNH 232893   | Uganda                       |          | Bikongoro Village, Buliisa                                    | 2.076738  | 31.43591 |
| <i>Nycteris hispida/aurita</i> | FMNH 137625   | Uganda                       |          | Bugala Island, Kalangala, 1.0 km N, 0.5 km E                  | -0.005278 | 0.538056 |
| <i>Nycteris hispida/aurita</i> | FMNH 137626   | Uganda                       |          | Bugala Island, Kalangala, 1.0 km N, 0.5 km E                  | -0.005278 | 0.538056 |
| <i>Nycteris hispida/aurita</i> | FMNH 232902   | Uganda                       |          | Bugungu Wildlife Reserve, Bugungu                             | 1.880648  | 31.47487 |
| <i>Nycteris hispida/aurita</i> | FMNH 232903   | Uganda                       |          | Bugungu Wildlife Reserve, Bugungu                             | 1.880648  | 31.47487 |
| <i>Nycteris hispida/aurita</i> | FMNH 232904   | Uganda                       |          | Bugungu Wildlife Reserve, Bugungu                             | 1.880648  | 31.47487 |

|                                |             |                   |              |                                                                  |           |          |
|--------------------------------|-------------|-------------------|--------------|------------------------------------------------------------------|-----------|----------|
| <i>Nycteris hispida/aurita</i> | FMNH 232905 | Uganda            |              | Bugungu Wildlife Reserve, Bugungu                                | 1.880648  | 31.47487 |
| <i>Nycteris hispida/aurita</i> | FMNH 232906 | Uganda            |              | Bugungu Wildlife Reserve, Bugungu                                | 1.886645  | 31.43456 |
| <i>Nycteris hispida/aurita</i> | FMNH 232908 | Uganda            |              | Bugungu Wildlife Reserve, Bugungu                                | 1.967507  | 31.51539 |
| <i>Nycteris hispida/aurita</i> | FMNH 165131 | Uganda            |              | Nyabyeya Forestry College, Budongo Forest                        | 1.68333   | 31.53333 |
| <i>Nycteris javanica</i>       | ROM 101970  | Indonesia, Borneo |              | Bukit Soeharto Experimental Forest, 60 km S of Samarinda         | -0.5      | 117      |
| <i>Nycteris macrotis</i> 1     | FMNH 216029 | Kenya             | Malindi      | Arabuko-Sokoke Forest, KWS Headquarters                          | -3.300017 | 39.99513 |
| <i>Nycteris macrotis</i> 1     | FMNH 216033 | Kenya             | Malindi      | Arabuko-Sokoke Forest, KWS Headquarters                          | -3.300017 | 39.99513 |
| <i>Nycteris macrotis</i> 1     | FMNH 220492 | Kenya             | Kilifi       | Arabuko-Sokoke National Park, Pipit Campsite                     | -3.29986  | 39.99509 |
| <i>Nycteris macrotis</i> 1     | FMNH 220494 | Kenya             | Kilifi       | Arabuko-Sokoke National Park, Pipit Campsite                     | -3.29986  | 39.99509 |
| <i>Nycteris macrotis</i> 1     | FMNH 216036 | Kenya             | Makueni      | Chyulu Hills National Park, Campsite                             | -2.49922  | 37.93981 |
| <i>Nycteris macrotis</i> 1     | FMNH 220981 | Kenya             | Makueni      | Chyulu Hills National Park, Campsite                             | -2.49922  | 37.93981 |
| <i>Nycteris macrotis</i> 1     | FMNH 216030 | Kenya             | Malindi      | Gedi Ruins                                                       | -3.3091   | 40.01763 |
| <i>Nycteris macrotis</i> 1     | FMNH 216031 | Kenya             | Malindi      | Gedi Ruins                                                       | -3.3091   | 40.01763 |
| <i>Nycteris macrotis</i> 1     | FMNH 216032 | Kenya             | Malindi      | Gedi Ruins                                                       | -3.3091   | 40.01763 |
| <i>Nycteris macrotis</i> 1     | FMNH 216034 | Kenya             | Malindi      | Mango orchard on E side of Malindi-Mombasa Hwy, 300 m N KWS Hdqs | -3.30325  | 39.99888 |
| <i>Nycteris macrotis</i> 1     | FMNH 216035 | Kenya             | Malindi      | Mango orchard on E side of Malindi-Mombasa Hwy, 300 m N KWS Hdqs | -3.30325  | 39.99888 |
| <i>Nycteris macrotis</i> 1     | FMNH 220742 | Kenya             | Meru         | Meru National Park, Kanjoo Gate Compound                         | 0.219817  | 38.06498 |
| <i>Nycteris macrotis</i> 1     | FMNH 220744 | Kenya             | Meru         | Meru National Park, Kanjoo Gate Compound                         | 0.219817  | 38.06498 |
| <i>Nycteris macrotis</i> 1     | FMNH 220745 | Kenya             | Meru         | Meru National Park, Kanjoo Gate Compound                         | 0.219817  | 38.06498 |
| <i>Nycteris macrotis</i> 1     | FMNH 215541 | Kenya             | Homa Bay     | Ruma National Park, houses outside of Headquarters Gate          | -0.65174  | 34.34336 |
| <i>Nycteris macrotis</i> 1     | FMNH 220977 | Kenya             | Taita-Taveta | Tsavo West National Park, Komboyo Campsite                       | -2.75443  | 38.11489 |
| <i>Nycteris macrotis</i> 1     | FMNH HB61   | South Sudan       |              | Badingilo National Park, Bala Pool, Wildlife HQs                 | 5.305333  | 31.84858 |
| <i>Nycteris macrotis</i> 1     | FMNH HB62   | South Sudan       |              | Badingilo National Park, Bala Pool, Wildlife HQs                 | 5.305333  | 31.84858 |
| <i>Nycteris macrotis</i> 1     | FMNH HB115  | South Sudan       |              | Badingilo National Park, Kweregik                                | 5.30438   | 31.85166 |
| <i>Nycteris macrotis</i> 1     | FMNH HB121  | South Sudan       |              | Nimule National Park, Paanzalla                                  | 3.585217  | 31.9834  |
| <i>Nycteris macrotis</i> 1     | FMNH HB122  | South Sudan       |              | Nimule National Park, Paanzalla                                  | 3.585217  | 31.9834  |
| <i>Nycteris macrotis</i> 1     | FMNH HB124  | South Sudan       |              | Nimule National Park, Paanzalla                                  | 3.585217  | 31.9834  |

|                            |             |                          |      |                                                               |           |          |
|----------------------------|-------------|--------------------------|------|---------------------------------------------------------------|-----------|----------|
| <i>Nycteris macrotis</i> 1 | FMNH 192937 | Tanzania                 |      | Minziro Forest                                                | -1.071261 | 31.5479  |
| <i>Nycteris macrotis</i> 1 | FMNH 219069 | Tanzania                 |      | Ruaha National Park, Maji Moto                                | -8.03658  | 34.50236 |
| <i>Nycteris macrotis</i> 1 | FMNH 219068 | Tanzania                 |      | Ruaha National Park, Mikindi Springs                          | -7.75111  | 34.55189 |
| <i>Nycteris macrotis</i> 1 | FMNH 219239 | Tanzania                 |      | Ruaha National Park, Mikindi Springs                          | -7.75111  | 34.55189 |
| <i>Nycteris macrotis</i> 1 | FMNH 232911 | Uganda                   |      | Bugungu Wildlife Reserve, Bugungu                             | 1.829568  | 31.41269 |
| <i>Nycteris macrotis</i> 1 | FMNH 232912 | Uganda                   |      | Bugungu Wildlife Reserve, Bugungu                             | 1.880648  | 31.47487 |
| <i>Nycteris macrotis</i> 1 | FMNH 232913 | Uganda                   |      | Bugungu Wildlife Reserve, Bugungu                             | 1.880648  | 31.47487 |
| <i>Nycteris macrotis</i> 1 | FMNH 232914 | Uganda                   |      | Bugungu Wildlife Reserve, Bugungu                             | 1.967507  | 31.51539 |
| <i>Nycteris macrotis</i> 1 | FMNH 232915 | Uganda                   |      | Bugungu Wildlife Reserve, Bugungu                             | 1.967507  | 31.51539 |
| <i>Nycteris macrotis</i> 1 | FMNH 232916 | Uganda                   |      | Bugungu Wildlife Reserve, Bugungu                             | 1.967507  | 31.51539 |
| <i>Nycteris macrotis</i> 1 | FMNH 232917 | Uganda                   |      | Bugungu Wildlife Reserve, Bugungu                             | 1.967507  | 31.51539 |
| <i>Nycteris macrotis</i> 1 | FMNH 223200 | Uganda                   |      | Mabira FR, Nagojje station, 0 .79 km NE of Nagojje            | 0.445128  | 32.88876 |
| <i>Nycteris macrotis</i> 1 | FMNH 223660 | Uganda                   |      | Murchison Falls NP, 1 km S Ayago R, weir site                 | 2.34000   | 31.926   |
| <i>Nycteris macrotis</i> 2 | FMNH 220739 | Kenya                    | Meru | Meru National Park, Leopard Rock Lodge                        | 0.222566  | 38.20085 |
| <i>Nycteris macrotis</i> 2 | FMNH 220740 | Kenya                    | Meru | Meru National Park, Leopard Rock Lodge                        | 0.222566  | 38.20085 |
| <i>Nycteris macrotis</i> 3 | FMNH 226237 | Malawi                   |      | Namizimu Forest Reserve, 1.7 km N of Kwitunji Camp            | -14.18875 | 35.38036 |
| <i>Nycteris macrotis</i> 3 | FMNH 228897 | Mozambique               |      | Chihalatan Caves (Gerhard's Cave), 38.2 km E Inhassoro        | -21.671   | 34.864   |
| <i>Nycteris macrotis</i> 3 | FMNH 228898 | Mozambique               |      | Chihalatan Caves (Gerhard's Cave), 38.2 km E Inhassoro        | -21.671   | 34.864   |
| <i>Nycteris macrotis</i> 3 | FMNH 228899 | Mozambique               |      | Chihalatan Caves (Gerhard's Cave), 38.2 km E Inhassoro        | -21.671   | 34.864   |
| <i>Nycteris macrotis</i> 3 | FMNH 228900 | Mozambique               |      | Chihalatan Caves (Gerhard's Cave), 38.2 km E Inhassoro        | -21.671   | 34.864   |
| <i>Nycteris macrotis</i> 3 | FMNH 228901 | Mozambique               |      | Chihalatan Caves (Gerhard's Cave), 38.2 km E Inhassoro        | -21.671   | 34.864   |
| <i>Nycteris nana</i> 1     | FMNH 227448 | Central African Republic |      | Parc National de Dzanga-Ndoki, Mabea Bai, 21.4 kms NE Bayanga | 3.0333    | 16.41    |
| <i>Nycteris nana</i> 2     | FMNH 227446 | Central African Republic |      | Parc National de Dzanga-Ndoki, Mabea Bai, 21.4 kms NE Bayanga | 3.0333    | 16.41    |
| <i>Nycteris nana</i> 2     | FMNH 167764 | Gabon                    |      | Aire d'Exploitation Rationelle de Faune des                   | -2.227778 | 10.39444 |

|                            |             |       |       |                                                                                                                                       |          |          |
|----------------------------|-------------|-------|-------|---------------------------------------------------------------------------------------------------------------------------------------|----------|----------|
| <i>Nycteris thebaica</i> 1 | FMNH 225423 | Kenya | Narok | Monts Doudou, 25.2 km NW Doussala<br>Mara Conservancy, Iseiya Public Campsite,<br>adjacent to Serena-Mara Conservancy<br>Headquarters | -1.40065 | 35.01825 |
| <i>Nycteris thebaica</i> 1 | FMNH 225424 | Kenya | Narok | Mara Conservancy, Iseiya Public Campsite,<br>adjacent to Serena-Mara Conservancy<br>Headquarters                                      | -1.40065 | 35.01825 |
| <i>Nycteris thebaica</i> 1 | FMNH 225425 | Kenya | Narok | Mara Conservancy, Iseiya Public Campsite,<br>adjacent to Serena-Mara Conservancy<br>Headquarters                                      | -1.40065 | 35.01825 |
| <i>Nycteris thebaica</i> 1 | FMNH 225426 | Kenya | Narok | Mara Conservancy, Iseiya Public Campsite,<br>adjacent to Serena-Mara Conservancy<br>Headquarters                                      | -1.40065 | 35.01825 |
| <i>Nycteris thebaica</i> 1 | FMNH 225420 | Kenya | Narok | Masai Mara National Reserve, Keekorok Lodge                                                                                           | -1.58963 | 35.23411 |
| <i>Nycteris thebaica</i> 1 | FMNH 225421 | Kenya | Narok | Masai Mara National Reserve, Keekorok Lodge                                                                                           | -1.58963 | 35.23411 |
| <i>Nycteris thebaica</i> 1 | FMNH 225406 | Kenya | Narok | Masai Mara National Reserve, Sarova Mara<br>Lodge                                                                                     | -1.53105 | 35.32022 |
| <i>Nycteris thebaica</i> 1 | FMNH 225407 | Kenya | Narok | Masai Mara National Reserve, Sarova Mara<br>Lodge                                                                                     | -1.53105 | 35.32022 |
| <i>Nycteris thebaica</i> 1 | FMNH 225408 | Kenya | Narok | Masai Mara National Reserve, Sarova Mara<br>Lodge                                                                                     | -1.53105 | 35.32022 |
| <i>Nycteris thebaica</i> 1 | FMNH 225409 | Kenya | Narok | Masai Mara National Reserve, Sarova Mara<br>Lodge                                                                                     | -1.53105 | 35.32022 |
| <i>Nycteris thebaica</i> 1 | FMNH 225410 | Kenya | Narok | Masai Mara National Reserve, Sarova Mara<br>Lodge                                                                                     | -1.53105 | 35.32022 |
| <i>Nycteris thebaica</i> 1 | FMNH 225411 | Kenya | Narok | Masai Mara National Reserve, Sarova Mara<br>Lodge                                                                                     | -1.53105 | 35.32022 |
| <i>Nycteris thebaica</i> 1 | FMNH 225412 | Kenya | Narok | Masai Mara National Reserve, Sarova Mara<br>Lodge                                                                                     | -1.53105 | 35.32022 |
| <i>Nycteris thebaica</i> 1 | FMNH 225413 | Kenya | Narok | Masai Mara National Reserve, Sarova Mara<br>Lodge                                                                                     | -1.53105 | 35.32022 |
| <i>Nycteris thebaica</i> 1 | FMNH 225442 | Kenya | Narok | Masai Mara National Reserve, Sarova Mara<br>Lodge                                                                                     | -1.53105 | 35.32022 |
| <i>Nycteris thebaica</i> 1 | FMNH 225443 | Kenya | Narok | Masai Mara National Reserve, Sarova Mara                                                                                              | -1.53105 | 35.32022 |

|                            |             |       |       |                                                |          |          |
|----------------------------|-------------|-------|-------|------------------------------------------------|----------|----------|
|                            |             |       |       | Lodge                                          |          |          |
| <i>Nycteris thebaica</i> 1 | FMNH 225444 | Kenya | Narok | Masai Mara National Reserve, Sarova Mara Lodge | -1.53105 | 35.32022 |
| <i>Nycteris thebaica</i> 1 | FMNH 225446 | Kenya | Narok | Masai Mara National Reserve, Sarova Mara Lodge | -1.53105 | 35.32022 |
| <i>Nycteris thebaica</i> 1 | FMNH 225447 | Kenya | Narok | Masai Mara National Reserve, Sarova Mara Lodge | -1.53105 | 35.32022 |
| <i>Nycteris thebaica</i> 1 | FMNH 225448 | Kenya | Narok | Masai Mara National Reserve, Sarova Mara Lodge | -1.53105 | 35.32022 |
| <i>Nycteris thebaica</i> 1 | FMNH 225449 | Kenya | Narok | Masai Mara National Reserve, Sarova Mara Lodge | -1.53105 | 35.32022 |
| <i>Nycteris thebaica</i> 1 | FMNH 225450 | Kenya | Narok | Masai Mara National Reserve, Sarova Mara Lodge | -1.53105 | 35.32022 |
| <i>Nycteris thebaica</i> 1 | FMNH 225451 | Kenya | Narok | Masai Mara National Reserve, Sarova Mara Lodge | -1.53105 | 35.32022 |
| <i>Nycteris thebaica</i> 1 | FMNH 225452 | Kenya | Narok | Masai Mara National Reserve, Sarova Mara Lodge | -1.53105 | 35.32022 |
| <i>Nycteris thebaica</i> 1 | FMNH 225453 | Kenya | Narok | Masai Mara National Reserve, Sarova Mara Lodge | -1.53105 | 35.32022 |
| <i>Nycteris thebaica</i> 1 | FMNH 225454 | Kenya | Narok | Masai Mara National Reserve, Sarova Mara Lodge | -1.53105 | 35.32022 |
| <i>Nycteris thebaica</i> 1 | FMNH 225455 | Kenya | Narok | Masai Mara National Reserve, Sarova Mara Lodge | -1.53105 | 35.32022 |
| <i>Nycteris thebaica</i> 1 | FMNH 225456 | Kenya | Narok | Masai Mara National Reserve, Sarova Mara Lodge | -1.53105 | 35.32022 |
| <i>Nycteris thebaica</i> 1 | FMNH 225457 | Kenya | Narok | Masai Mara National Reserve, Sarova Mara Lodge | -1.53105 | 35.32022 |
| <i>Nycteris thebaica</i> 1 | FMNH 225458 | Kenya | Narok | Masai Mara National Reserve, Sarova Mara Lodge | -1.53105 | 35.32022 |
| <i>Nycteris thebaica</i> 1 | FMNH 225459 | Kenya | Narok | Masai Mara National Reserve, Sarova Mara Lodge | -1.53105 | 35.32022 |
| <i>Nycteris thebaica</i> 1 | FMNH 225460 | Kenya | Narok | Masai Mara National Reserve, Sarova Mara Lodge | -1.53105 | 35.32022 |
| <i>Nycteris thebaica</i> 1 | FMNH 225461 | Kenya | Narok | Masai Mara National Reserve, Sarova Mara       | -1.53105 | 35.32022 |



|                            |             |        |       |                                                |          |          |
|----------------------------|-------------|--------|-------|------------------------------------------------|----------|----------|
|                            |             |        |       | Lodge                                          |          |          |
| <i>Nycteris thebaica</i> 1 | FMNH 225462 | Kenya  | Narok | Masai Mara National Reserve, Sarova Mara Lodge | -1.53105 | 35.32022 |
| <i>Nycteris thebaica</i> 1 | FMNH 225463 | Kenya  | Narok | Masai Mara National Reserve, Sarova Mara Lodge | -1.53105 | 35.32022 |
| <i>Nycteris thebaica</i> 1 | FMNH 225464 | Kenya  | Narok | Masai Mara National Reserve, Sarova Mara Lodge | -1.53105 | 35.32022 |
| <i>Nycteris thebaica</i> 1 | FMNH 225465 | Kenya  | Narok | Masai Mara National Reserve, Sarova Mara Lodge | -1.53105 | 35.32022 |
| <i>Nycteris thebaica</i> 1 | FMNH 225466 | Kenya  | Narok | Masai Mara National Reserve, Sarova Mara Lodge | -1.53105 | 35.32022 |
| <i>Nycteris thebaica</i> 1 | FMNH 225467 | Kenya  | Narok | Masai Mara National Reserve, Sarova Mara Lodge | -1.53105 | 35.32022 |
| <i>Nycteris thebaica</i> 1 | FMNH 225468 | Kenya  | Narok | Masai Mara National Reserve, Sarova Mara Lodge | -1.53105 | 35.32022 |
| <i>Nycteris thebaica</i> 1 | FMNH 225469 | Kenya  | Narok | Masai Mara National Reserve, Sarova Mara Lodge | -1.53105 | 35.32022 |
| <i>Nycteris thebaica</i> 1 | FMNH 225470 | Kenya  | Narok | Masai Mara National Reserve, Sarova Mara Lodge | -1.53105 | 35.32022 |
| <i>Nycteris thebaica</i> 1 | FMNH 225471 | Kenya  | Narok | Masai Mara National Reserve, Sarova Mara Lodge | -1.53105 | 35.32022 |
| <i>Nycteris thebaica</i> 1 | FMNH 225472 | Kenya  | Narok | Masai Mara National Reserve, Sarova Mara Lodge | -1.53105 | 35.32022 |
| <i>Nycteris thebaica</i> 1 | FMNH 225473 | Kenya  | Narok | Masai Mara National Reserve, Sarova Mara Lodge | -1.53105 | 35.32022 |
| <i>Nycteris thebaica</i> 1 | FMNH 225474 | Kenya  | Narok | Masai Mara National Reserve, Sarova Mara Lodge | -1.53105 | 35.32022 |
| <i>Nycteris thebaica</i> 1 | FMNH 225241 | Rwanda |       | Kinihira                                       | -2.15592 | 29.62351 |
| <i>Nycteris thebaica</i> 1 | FMNH 225242 | Rwanda |       | Kinihira                                       | -2.15592 | 29.62351 |
| <i>Nycteris thebaica</i> 1 | FMNH 225243 | Rwanda |       | Kinihira                                       | -2.15592 | 29.62351 |
| <i>Nycteris thebaica</i> 1 | FMNH 225244 | Rwanda |       | Kinihira                                       | -2.15592 | 29.62351 |
| <i>Nycteris thebaica</i> 1 | FMNH 225245 | Rwanda |       | Kinihira                                       | -2.15592 | 29.62351 |
| <i>Nycteris thebaica</i> 1 | FMNH 225210 | Rwanda |       | Susa Cave                                      | -1.50575 | 29.61465 |

|                            |             |          |          |                                                             |          |          |
|----------------------------|-------------|----------|----------|-------------------------------------------------------------|----------|----------|
| <i>Nycteris thebaica</i> 2 | FMNH 198085 | Tanzania |          | Urban Region, West District, Dole, Masingini Forest Station | -6.10155 | 39.24333 |
| <i>Nycteris thebaica</i> 2 | FMNH 198086 | Tanzania |          | Urban Region, West District, Dole, Masingini Forest Station | -6.10155 | 39.24333 |
| <i>Nycteris thebaica</i> 2 | FMNH 198087 | Tanzania |          | Urban Region, West District, Dole, Masingini Forest Station | -6.10155 | 39.24333 |
| <i>Nycteris thebaica</i> 2 | FMNH 198088 | Tanzania |          | Urban Region, West District, Dole, Masingini Forest Station | -6.10155 | 39.24333 |
| <i>Nycteris thebaica</i> 2 | FMNH 198089 | Tanzania |          | Urban Region, West District, Dole, Masingini Forest Station | -6.10155 | 39.24333 |
| <i>Nycteris thebaica</i> 2 | FMNH 147220 | Tanzania |          | West Usambara Mts, 14.5 km NW Korogwe, Ambangulu Tea Estate | -5.05    | 38.38334 |
| <i>Nycteris thebaica</i> 3 | NMK 184759  | Kenya    | Nakuru   | Gilgil, Pipeline Cave                                       | -0.53911 | 36.29431 |
| <i>Nycteris thebaica</i> 3 | NMK 184854  | Kenya    | Nakuru   | Gilgil, Pipeline Cave                                       | -0.53911 | 36.29431 |
| <i>Nycteris thebaica</i> 3 | NMK 184855  | Kenya    | Nakuru   | Gilgil, Pipeline Cave                                       | -0.53911 | 36.29431 |
| <i>Nycteris thebaica</i> 3 | NMK 187337  | Kenya    | Nakuru   | Gilgil, Pipeline Cave                                       | -0.53911 | 36.29431 |
| <i>Nycteris thebaica</i> 3 | NMK 187338  | Kenya    | Nakuru   | Gilgil, Pipeline Cave                                       | -0.53911 | 36.29431 |
| <i>Nycteris thebaica</i> 3 | NMK 187339  | Kenya    | Nakuru   | Gilgil, Pipeline Cave                                       | -0.53911 | 36.29431 |
| <i>Nycteris thebaica</i> 3 | NMK 187340  | Kenya    | Nakuru   | Gilgil, Pipeline Cave                                       | -0.53911 | 36.29431 |
| <i>Nycteris thebaica</i> 3 | NMK 187341  | Kenya    | Nakuru   | Gilgil, Pipeline Cave                                       | -0.53911 | 36.29431 |
| <i>Nycteris thebaica</i> 3 | NMK 187450  | Kenya    | Kakamega | Kakamega Forest National Reserve, Buyangu KWS HQ            | 0.355    | 34.86567 |
| <i>Nycteris thebaica</i> 3 | FMNH 215536 | Kenya    | Kakamega | Kakamega National Reserve, Ikhondo Campground               | 0.3523   | 34.86469 |
| <i>Nycteris thebaica</i> 3 | FMNH 215537 | Kenya    | Kakamega | Kakamega National Reserve, Ikhondo Campground               | 0.3523   | 34.86469 |
| <i>Nycteris thebaica</i> 3 | FMNH 215538 | Kenya    | Kakamega | Kakamega National Reserve, Ikhondo Campground               | 0.3523   | 34.86469 |
| <i>Nycteris thebaica</i> 3 | FMNH 215542 | Kenya    | Nakuru   | Lake Nakuru National Park, Lion Hill Cave                   | -0.3459  | 36.11916 |
| <i>Nycteris thebaica</i> 3 | FMNH 215543 | Kenya    | Nakuru   | Lake Nakuru National Park, Lion Hill Cave                   | -0.3459  | 36.11916 |
| <i>Nycteris thebaica</i> 3 | FMNH 215544 | Kenya    | Nakuru   | Lake Nakuru National Park, Lion Hill Cave                   | -0.3459  | 36.11916 |
| <i>Nycteris thebaica</i> 3 | FMNH 215545 | Kenya    | Nakuru   | Lake Nakuru National Park, Lion Hill Cave                   | -0.3459  | 36.11916 |
| <i>Nycteris thebaica</i> 3 | FMNH 225400 | Kenya    | Nakuru   | Lake Nakuru National Park, Lion Hill Cave                   | -0.3459  | 36.11916 |

|                            |             |        |          |                                                          |           |          |
|----------------------------|-------------|--------|----------|----------------------------------------------------------|-----------|----------|
| <i>Nycteris thebaica</i> 3 | FMNH 225401 | Kenya  | Nakuru   | Lake Nakuru National Park, Lion Hill Cave                | -0.3459   | 36.11916 |
| <i>Nycteris thebaica</i> 3 | FMNH 225402 | Kenya  | Nakuru   | Lake Nakuru National Park, Lion Hill Cave                | -0.3459   | 36.11916 |
| <i>Nycteris thebaica</i> 3 | FMNH 225403 | Kenya  | Nakuru   | Lake Nakuru National Park, Lion Hill Cave                | -0.3459   | 36.11916 |
| <i>Nycteris thebaica</i> 3 | FMNH 225404 | Kenya  | Nakuru   | Lake Nakuru National Park, Lion Hill Cave                | -0.3459   | 36.11916 |
| <i>Nycteris thebaica</i> 3 | FMNH 225405 | Kenya  | Nakuru   | Lake Nakuru National Park, Lion Hill Cave                | -0.3459   | 36.11916 |
| <i>Nycteris thebaica</i> 3 | NMK 184520  | Kenya  | Laikipia | Loll Daiga Hills Conservancy, Farm House                 | 0.20138   | 37.12987 |
| <i>Nycteris thebaica</i> 3 | NMK 184521  | Kenya  | Laikipia | Loll Daiga Hills Conservancy, Farm House                 | 0.20138   | 37.12987 |
| <i>Nycteris thebaica</i> 3 | NMK 184522  | Kenya  | Laikipia | Loll Daiga Hills Conservancy, Farm House                 | 0.20138   | 37.12987 |
| <i>Nycteris thebaica</i> 3 | NMK 184407  | Kenya  | Laikipia | Loll Daiga Hills Conservancy, Kiburuti Bridge            | 0.30823   | 37.15246 |
| <i>Nycteris thebaica</i> 3 | NMK 184636  | Kenya  | Laikipia | Loll Daiga Hills Conservancy, West Kiburuti Borehole Dam | 0.18764   | 37.08247 |
| <i>Nycteris thebaica</i> 3 | FMNH 220741 | Kenya  | Meru     | Meru National Park, Leopard Rock Lodge                   | 0.222566  | 38.20085 |
| <i>Nycteris thebaica</i> 3 | NMK 185133  | Kenya  | Kitui    | Mwingi, Nu, Khaluku Rock Dam                             | -0.99208  | 38.33025 |
| <i>Nycteris thebaica</i> 3 | NMK 184658  | Kenya  | Baringo  | Ol Jogi Conservancy, Pyramid Camp                        | 0.30933   | 36.07609 |
| <i>Nycteris thebaica</i> 3 | FMNH 232429 | Uganda |          | Agoro Agu Forest Reserve                                 | 3.81039   | 32.92264 |
| <i>Nycteris thebaica</i> 3 | FMNH 232430 | Uganda |          | Agoro Agu Forest Reserve                                 | 3.81039   | 32.92264 |
| <i>Nycteris thebaica</i> 3 | FMNH 232431 | Uganda |          | Agoro Agu Forest Reserve                                 | 3.81039   | 32.92264 |
| <i>Nycteris thebaica</i> 3 | FMNH 232919 | Uganda |          | Bugungu Wildlife Reserve, Bugungu                        | 1.967507  | 31.51539 |
| <i>Nycteris thebaica</i> 3 | FMNH 232109 | Uganda |          | Mt Morungole                                             | 3.81083   | 34.02931 |
| <i>Nycteris thebaica</i> 4 | FMNH 216037 | Kenya  | Malindi  | Arabuko-Sokoke Forest, KWS Headquarters                  | -3.300017 | 39.99513 |
| <i>Nycteris thebaica</i> 4 | FMNH 216039 | Kenya  | Malindi  | Arabuko-Sokoke Forest, KWS Headquarters                  | -3.300017 | 39.99513 |
| <i>Nycteris thebaica</i> 4 | FMNH 216042 | Kenya  | Malindi  | Arabuko-Sokoke Forest, KWS Headquarters                  | -3.300017 | 39.99513 |
| <i>Nycteris thebaica</i> 4 | FMNH 216043 | Kenya  | Malindi  | Arabuko-Sokoke Forest, KWS Headquarters                  | -3.300017 | 39.99513 |
| <i>Nycteris thebaica</i> 4 | FMNH 220447 | Kenya  | Kilifi   | Arabuko-Sokoke National Park, Pipit Campsite             | -3.29986  | 39.99509 |
| <i>Nycteris thebaica</i> 4 | FMNH 216040 | Kenya  | Malindi  | Gedi Ruins                                               | -3.3091   | 40.01763 |
| <i>Nycteris thebaica</i> 4 | FMNH 220484 | Kenya  | Kwale    | Kenya Forest Service, Kwale Office, Director's House     | -4.173748 | 39.45206 |
| <i>Nycteris thebaica</i> 4 | FMNH 220485 | Kenya  | Kwale    | Kenya Forest Service, Kwale Office, Director's House     | -4.173748 | 39.45206 |
| <i>Nycteris thebaica</i> 4 | FMNH 220486 | Kenya  | Kwale    | Kenya Forest Service, Kwale Office, Director's House     | -4.173748 | 39.45206 |
| <i>Nycteris thebaica</i> 4 | FMNH 220487 | Kenya  | Kwale    | Kenya Forest Service, Kwale Office, Director's House     | -4.173748 | 39.45206 |

|                            |             |            |       |                                                      |           |          |
|----------------------------|-------------|------------|-------|------------------------------------------------------|-----------|----------|
|                            |             |            |       | House                                                |           |          |
| <i>Nycteris thebaica</i> 4 | FMNH 220488 | Kenya      | Kwale | Kenya Forest Service, Kwale Office, Director's House | -4.173748 | 39.45206 |
| <i>Nycteris thebaica</i> 4 | FMNH 220446 | Kenya      | Kwale | Shimba Hills National Reserve, Sable Bandas          | -4.21521  | 39.45133 |
| <i>Nycteris thebaica</i> 4 | FMNH 220448 | Kenya      | Kwale | Shimba Hills National Reserve, Sable Bandas          | -4.21521  | 39.45133 |
| <i>Nycteris thebaica</i> 4 | FMNH 220449 | Kenya      | Kwale | Shimba Hills National Reserve, Sable Bandas          | -4.21521  | 39.45133 |
| <i>Nycteris thebaica</i> 4 | FMNH 220450 | Kenya      | Kwale | Shimba Hills National Reserve, Sable Bandas          | -4.21521  | 39.45133 |
| <i>Nycteris thebaica</i> 4 | FMNH 220451 | Kenya      | Kwale | Shimba Hills National Reserve, Sable Bandas          | -4.21521  | 39.45133 |
| <i>Nycteris thebaica</i> 4 | FMNH 220452 | Kenya      | Kwale | Shimba Hills National Reserve, Sable Bandas          | -4.21521  | 39.45133 |
| <i>Nycteris thebaica</i> 4 | FMNH 220453 | Kenya      | Kwale | Shimba Hills National Reserve, Sable Bandas          | -4.21521  | 39.45133 |
| <i>Nycteris thebaica</i> 4 | FMNH 220455 | Kenya      | Kwale | Shimba Hills National Reserve, Sable Bandas          | -4.21521  | 39.45133 |
| <i>Nycteris thebaica</i> 5 | FMNH 213626 | Mozambique |       | Ilha de Mozambique, Museu da Ilha de Mozambique      | -15.03513 | 40.73499 |
| <i>Nycteris thebaica</i> 5 | FMNH 213627 | Mozambique |       | Ilha de Mozambique, Museu da Ilha de Mozambique      | -15.03513 | 40.73499 |
| <i>Nycteris thebaica</i> 5 | FMNH 213628 | Mozambique |       | Ilha de Mozambique, Museu da Ilha de Mozambique      | -15.03513 | 40.73499 |
| <i>Nycteris thebaica</i> 5 | FMNH 213629 | Mozambique |       | Ilha de Mozambique, Museu da Ilha de Mozambique      | -15.03513 | 40.73499 |
| <i>Nycteris thebaica</i> 5 | FMNH 213630 | Mozambique |       | Ilha de Mozambique, Museu da Ilha de Mozambique      | -15.03513 | 40.73499 |
| <i>Nycteris thebaica</i> 5 | FMNH 213631 | Mozambique |       | Ilha de Mozambique, Museu da Ilha de Mozambique      | -15.03513 | 40.73499 |
| <i>Nycteris thebaica</i> 5 | FMNH 213632 | Mozambique |       | Kissona village                                      | -15.06079 | 40.66266 |
| <i>Nycteris thebaica</i> 6 | FMNH 226240 | Malawi     |       | Mangochi Hills, above Skull Rock Scout Camp          | -14.51389 | 35.46478 |
| <i>Nycteris thebaica</i> 6 | FMNH 226238 | Malawi     |       | Namizimu Forest Reserve, 1.7 km N of Kwitunji Camp   | -14.18875 | 35.38036 |
| <i>Nycteris thebaica</i> 6 | FMNH 187360 | Tanzania   |       | Juani Island                                         | -7.99285  | 39.79242 |
| <i>Nycteris thebaica</i> 6 | FMNH 187412 | Tanzania   |       | Juani Island                                         | -7.99285  | 39.79242 |
| <i>Nycteris thebaica</i> 6 | FMNH 193210 | Tanzania   |       | Kibebe Farms, approx 6 km ESE Iringa                 | -7.7978   | 35.7567  |
| <i>Nycteris thebaica</i> 6 | FMNH 187361 | Tanzania   |       | Mafia Island, Utende                                 | -7.9761   | 39.74447 |
| <i>Nycteris thebaica</i> 6 | FMNH 219066 | Tanzania   |       | Ruaha National Park, Mikindi Springs                 | -7.75111  | 34.55189 |

|                            |             |          |       |                                         |          |          |
|----------------------------|-------------|----------|-------|-----------------------------------------|----------|----------|
| <i>Nycteris thebaica</i> 6 | FMNH 219067 | Tanzania |       | Ruaha National Park, Mikindi Springs    | -7.75111 | 34.55189 |
| <i>Nycteris tragata</i>    | LSUMZ 4413  | Malaysia |       |                                         |          |          |
| <i>Nycteris tragata</i>    | TTU 108180  | Malaysia |       | Krau Game Reserve                       | 3.596    | 102.1817 |
| <i>Coleura afra</i>        | FMNH 220403 | Kenya    | Kwale | Fikirini, Three Sisters, Mbenyenye Cave |          |          |

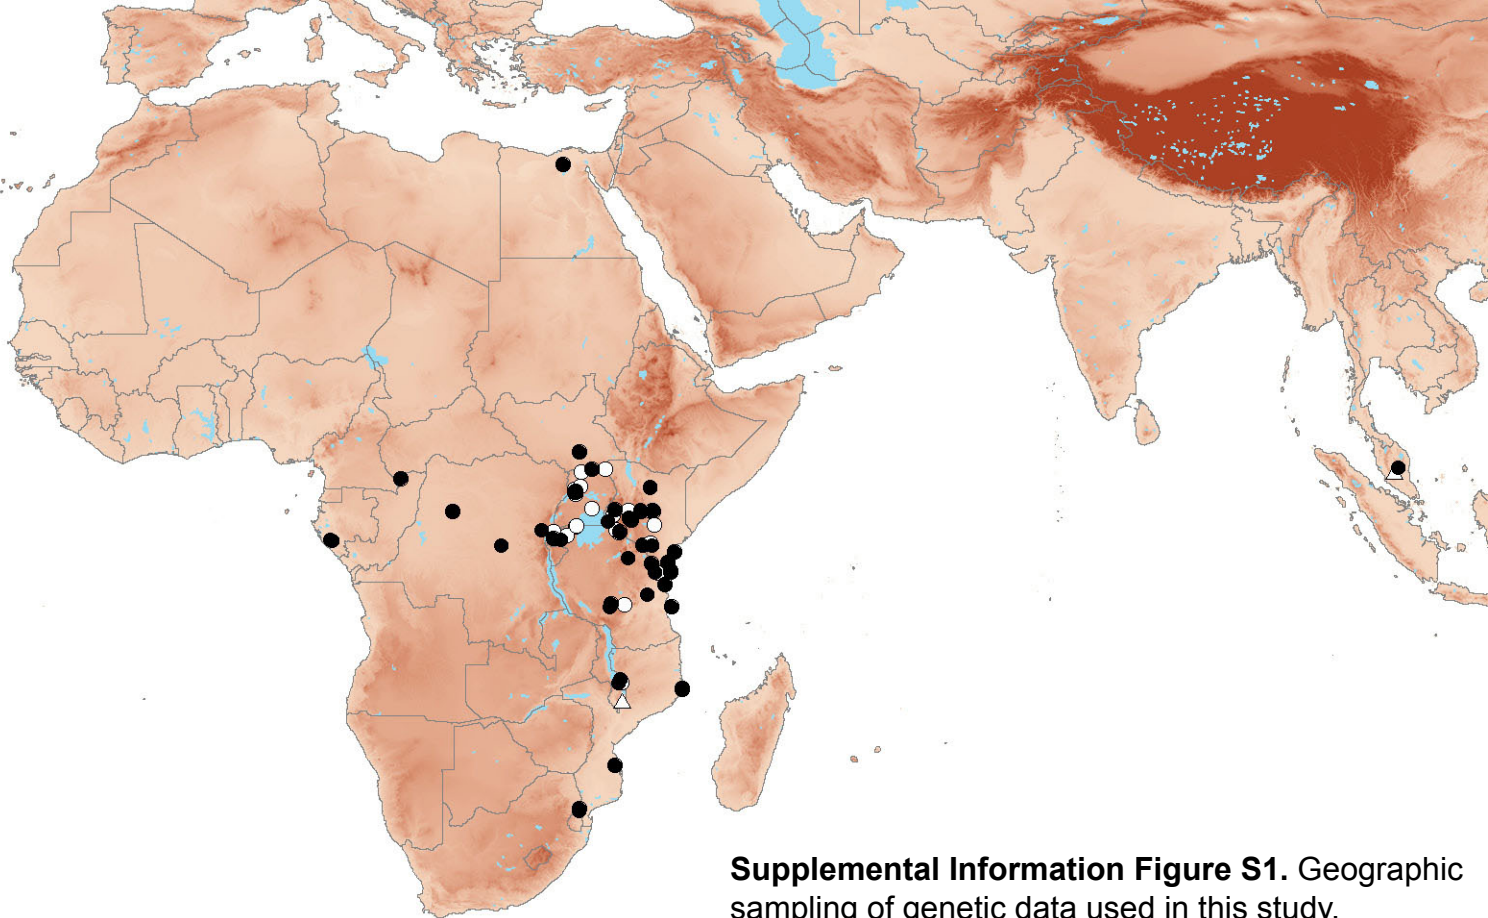

**Supplemental Information Figure S1.** Geographic sampling of genetic data used in this study.

**Supplemental Information Figure S2.** Species tree inferred in StarBEAST for *Nycteris* for 21 clades, including *Nycteris thebaica* clades 1 to 6.

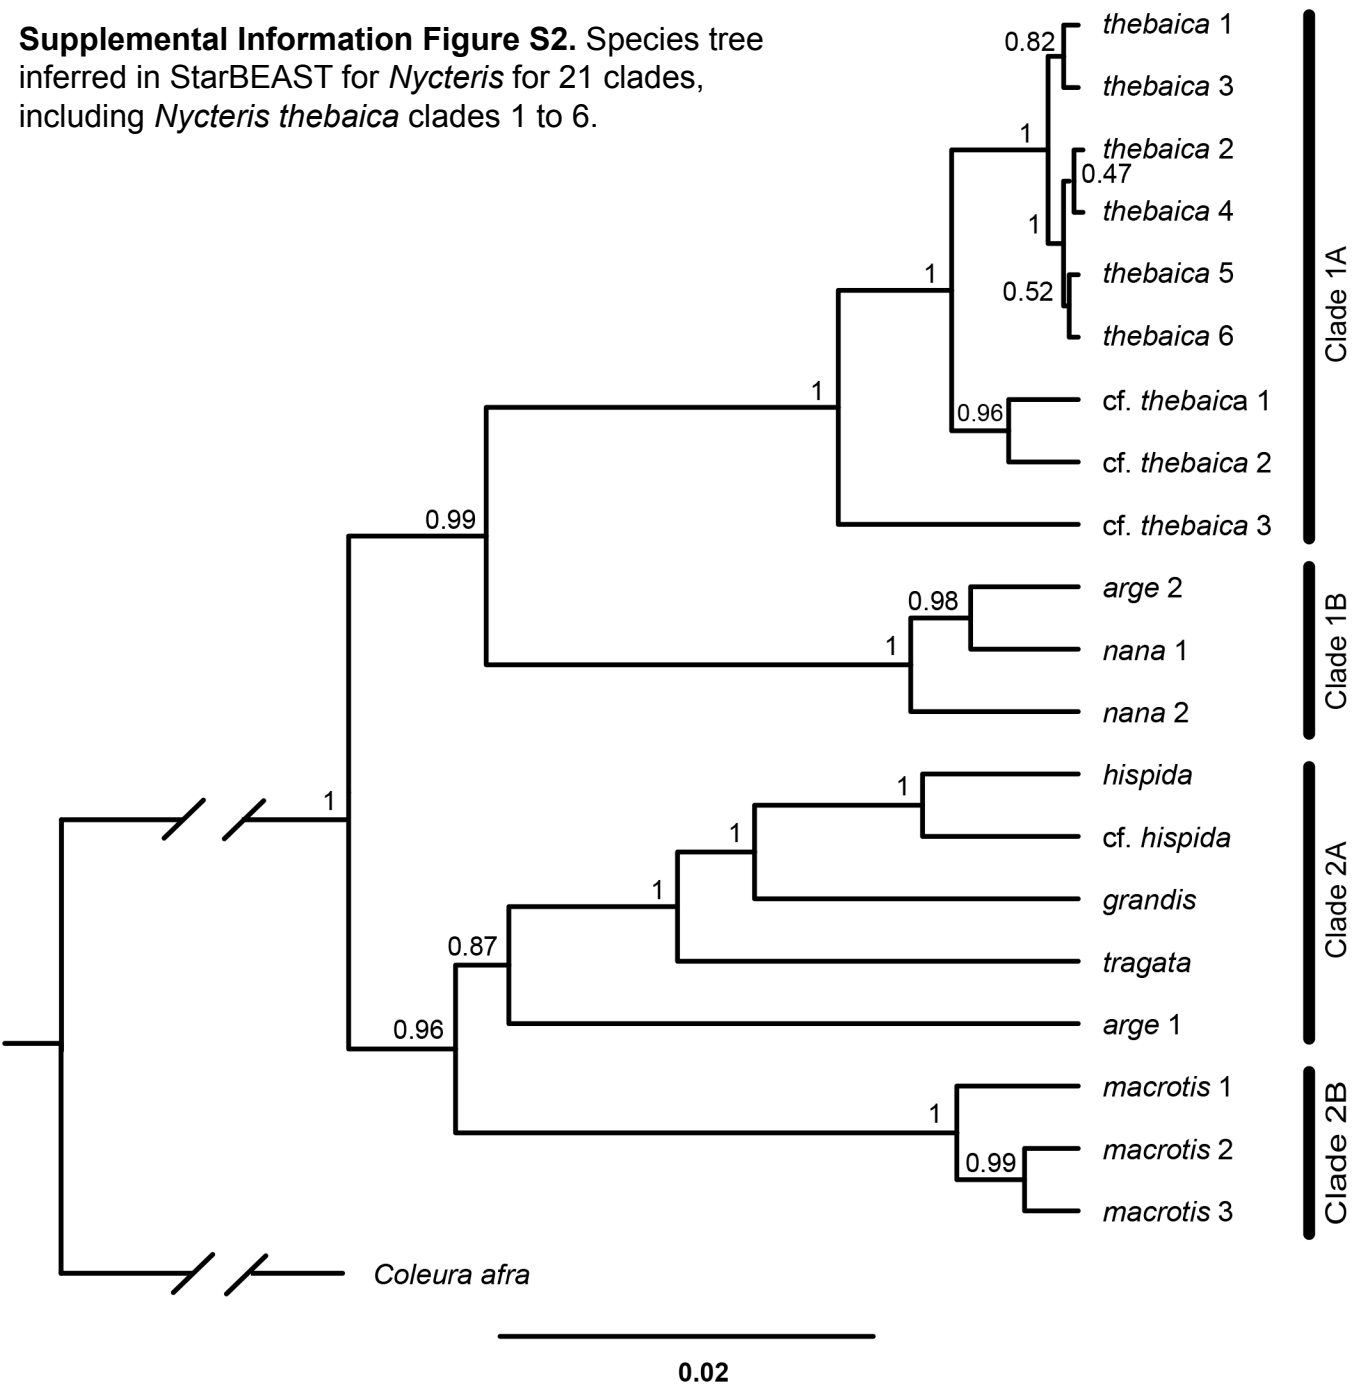

Supplement: JZS-57-1019-s001.pdf [file JZS-57-1019-s001.pdf]
